# Supplementary material for: Trace level determination of Hg2+ ions in environmental samples with a mercaptotriazole-functionalized TiO2 nanostructure-based fluorescent probe
Source: Royal Society of Chemistry journal article supplement (doi:10.1039/c8ay02109k), 2018-12-13
Supplement: c8ay02109k1.pdf [file c8ay02109k1.pdf]

## Electronic Supplementary Information

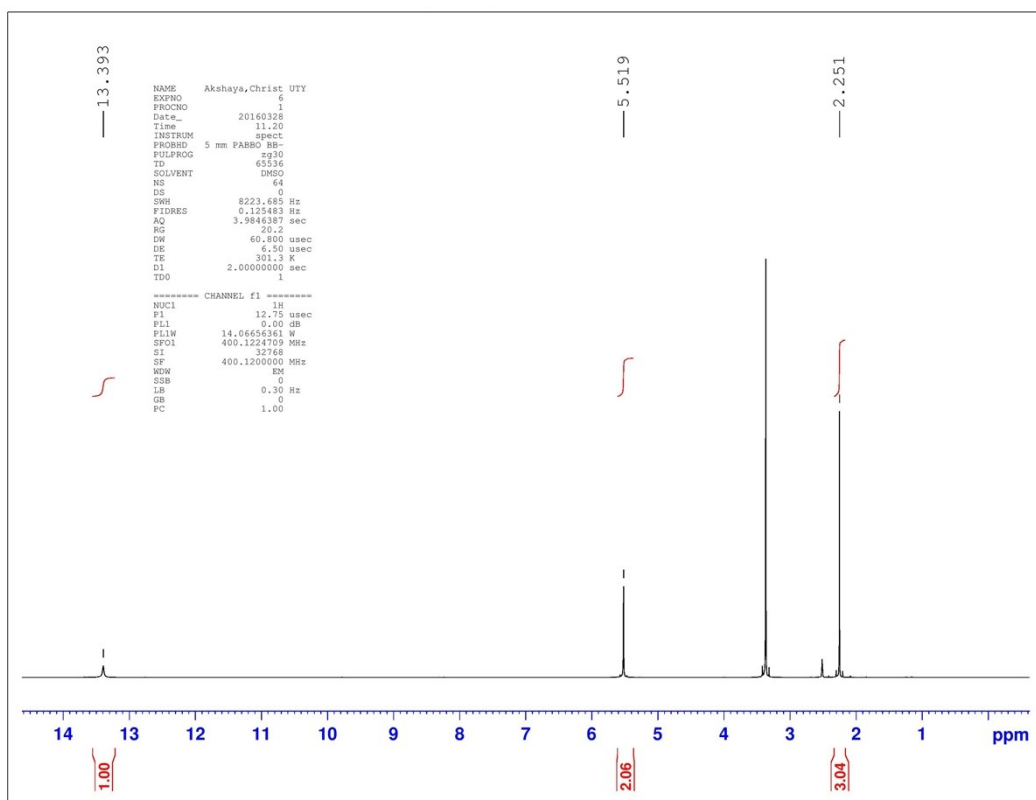

**Fig. S1** <sup>1</sup>H NMR spectrum of MMT.

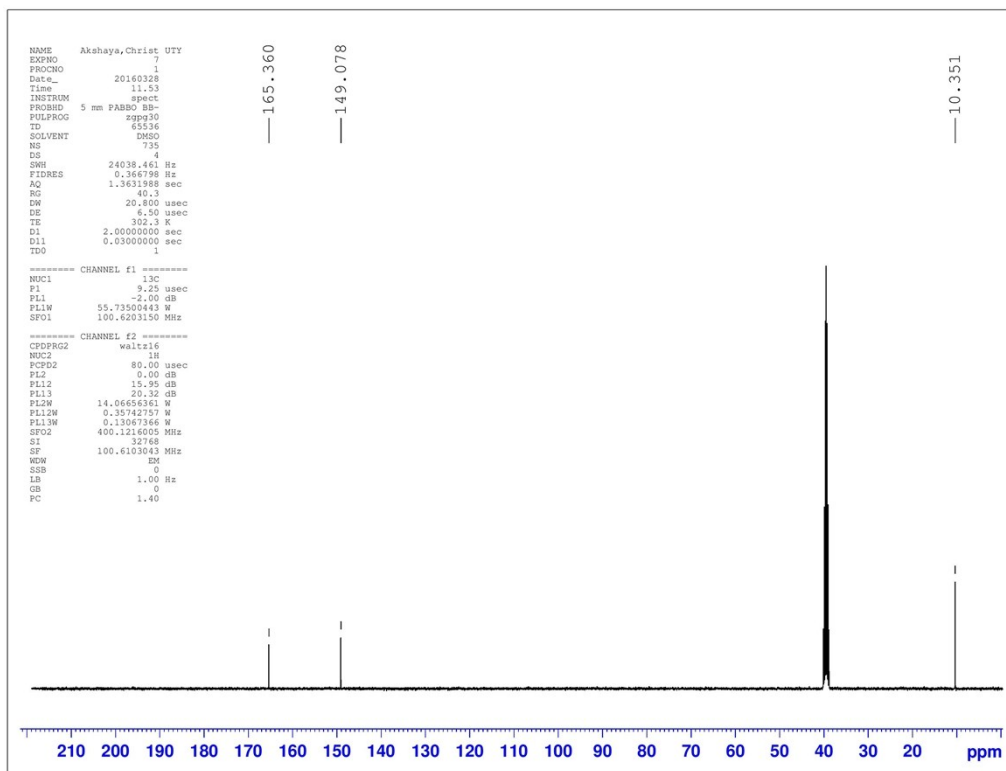

**Fig. S2** <sup>13</sup>C NMR spectrum of MMT.
